1 **Original Article**

2 Factors associated with acceptance of a digital contact tracing application for COVID-19  
3 in the Japanese working-age population

4  
5 Tomohiro Ishimaru<sup>1</sup>, MD, MPH, PhD, Koki Ibayashi<sup>1</sup>, MD, Masako Nagata<sup>2</sup>, MD, PhD,  
6 Seiichiro Tateishi<sup>3</sup>, MD, PhD, Ayako Hino<sup>4</sup>, MD, PhD, Mayumi Tsuji<sup>5</sup>, MD, PhD, Hajime  
7 Ando<sup>6</sup>, MD, MOH, PhD, Keiji Muramatsu<sup>7</sup>, MD, PhD, and Yoshihisa Fujino<sup>1</sup>, MD, MPH,  
8 PhD, for the CORoNaWork Project

9  
10 <sup>1</sup>Department of Environmental Epidemiology, Institute of Industrial Ecological Sciences,  
11 University of Occupational and Environmental Health, Japan, Kitakyushu, Japan

12 <sup>2</sup>Department of Occupational Health Practice and Management, Institute of Industrial  
13 Ecological Sciences, University of Occupational and Environmental Health, Japan,  
14 Kitakyushu, Japan

15 <sup>3</sup>Department of Mental Health, Institute of Industrial Ecological Sciences, University of  
16 Occupational and Environmental Health, Japan, Kitakyushu, Japan

17 <sup>4</sup>Department of Occupational Medicine, School of Medicine, University of Occupational  
18 and Environmental Health, Japan, Kitakyushu, Japan

19 <sup>5</sup>Department of Environmental Health, School of Medicine, University of Occupational and  
20 Environmental Health, Japan, Kitakyushu, Japan

21 <sup>6</sup>Department of Work Systems and Health, Institute of Industrial Ecological Sciences,  
22 University of Occupational and Environmental Health, Japan, Kitakyushu, Japan

23 <sup>7</sup>Department of Preventive Medicine and Community Health, School of Medicine,  
24 University of Occupational and Environmental Health, Japan, Kitakyushu, Japan

25  
26 **Corresponding Author:** Tomohiro Ishimaru, MD, MPH, PhD, Department of  
27 Environmental Epidemiology, Institute of Industrial Ecological Sciences, University of  
28 Occupational and Environmental Health, Japan, 1-1 Iseigaoka, Yahata-nishi-ku,  
29 Kitakyushu, Fukuoka 807-8555, Japan  
30 Tel: +81-93-603-1611; Fax: +81-93-601-7324; E-mail: [ishimaru@med.uoeh-u.ac.jp](mailto:ishimaru@med.uoeh-u.ac.jp)

### 32 **Funding Sources**

33 This study was supported and partly funded by the University of Occupational and  
34 Environmental Health, Japan (no grant number), the Japanese Ministry of Health, Labour  
35 and Welfare (H30-josei-ippan-002, H30-roudou-ippan-007, 19JA1004, 20JA1006,  
36 210301-1, and 20HB1004), Anshin Zaidan (no grant number), the Collabo-Health Study  
37 Group (no grant number), Hitachi Systems Ltd. (no grant number), and scholarship  
38 donations from Chugai Pharmaceutical Co. Ltd. (no grant numbers). The funders were  
39 not involved in the design of the study, the collection, analysis, and interpretation of data,  
40 the writing of the article, or the decision to submit the manuscript for publication.

### 42 **Conflict of Interest**

43 None declared.

### 45 **Acknowledgments**

46 The current members of the CORoNaWork Project, in alphabetical order, are: Prof.  
47 Yoshihisa Fujino (present chairperson of the study group), Dr. Hajime Ando, Prof. Hisashi  
48 Eguchi, Dr. Kazunori Ikegami, Dr. Arisa Harada, Dr. Ayako Hino, Dr. Tomohiro Ishimaru,

49 Dr. Kyoko Kitagawa, Ms. Ning Liu, Dr. Kosuke Mafune, Prof. Shinya Matsuda, Dr. Ryutaro  
50 Matsugaki, Prof. Koji Mori, Dr. Keiji Muramatsu, Dr. Masako Nagata, Dr. Tomohisa Nagata,  
51 Prof. Akira Ogami, Dr. Rie Tanaka, Dr. Seiishiro Tateishi, Dr. Kei Tokutsu, and Prof.  
52 Mayumi Tsuji. All members are affiliated with the University of Occupational and  
53 Environmental Health, Japan.

54

### 55 **Ethical Considerations & Disclosures**

56 This study was approved by the Ethics Committee of the University of Occupational and  
57 Environmental Health, Japan (R2-079).

58

59 **Running Title:** Workers' acceptance of a DCT app for COVID-19

60

61 **Abstract**

62 **Objective:** This study aimed to determine factors associated with acceptance of a Digital  
63 Contact Tracing (DCT) app for Coronavirus Disease 2019 (COVID-19) in the Japanese  
64 working-age population.

65 **Methods:** A cross-sectional study was performed for 27,036 full-time workers registered  
66 with an internet survey company during December 2020 in Japan.

67 **Results:** The rate of downloading the DCT app was 25.1%. The DCT app was more  
68 likely to be accepted by people with married status, university graduation or above,  
69 higher income, and occupations involving desk work. Fear of COVID-19 transmission,  
70 wearing a mask, using hand disinfection, willingness to be vaccinated against COVID-19,  
71 and presence of an acquaintance infected with COVID-19 were also associated with a  
72 greater likelihood of adopting the app.

73 **Conclusions:** The present findings have important implications for widespread adoption  
74 of DCT apps in working-age populations in Japan and elsewhere.

75

76 **Keywords:** Contact tracing, COVID-19, SARS-CoV-2, smartphone, worksite

77

78 **Introduction**

79 Digital Contact Tracing (DCT) has been used in many countries in response to the  
80 coronavirus disease 2019 (COVID-19) pandemic. DCT apps implemented in mobile  
81 devices (e.g. smartphones) can be employed to detect close contact with infected  
82 individuals and prevent the spread of COVID-19.<sup>1</sup> Although the method of contact tracing  
83 has been used for a long time, traditional paper-based surveys are complicated and  
84 time-consuming, and are affected by loss of questionnaires and huge amounts of data  
85 entry.<sup>2</sup> With the recent development of digital technology and the widespread use of  
86 mobile devices, DCT has overcome the shortcomings of traditional paper-based surveys  
87 and made it possible to conduct surveys more quickly. In recent years, DCT has been  
88 associated with effective control of Ebola hemorrhagic fever in Sierra Leone, tuberculosis  
89 in Botswana, and whooping cough in the United States.<sup>3</sup>

90  
91 Ensuring that large numbers of people install DCT apps is essential for effective  
92 operation of DCT against COVID-19.<sup>4-6</sup> Previous studies revealed that demographic,  
93 behavioral, psychological, and COVID-19-related factors all influence the installation of  
94 DCT apps.<sup>1, 3, 7-9</sup> From the demographic aspect, ethnic minorities, migrants, low-income  
95 people, and elderly people were less likely to install the apps.<sup>3</sup> From the behavioral  
96 aspect, non-smoking status was associated with high app acceptance, while lack of  
97 information technology skills and not having a smartphone were associated with low app  
98 acceptance.<sup>1, 8</sup> From the psychological aspect, low app acceptance was associated with  
99 doubts about the effectiveness of DCT apps, anxiety about the collection of personal  
100 information, and distrust of the government and app developers.<sup>8, 9</sup> From the  
101 COVID-19-related aspect, acceptance of new lifestyles under the COVID-19 epidemic

102 such as use of hand sanitizers, avoidance of public transportation, and wearing masks  
103 was associated with app use.<sup>7, 8</sup>

104  
105 Because the working-age population is at the epicenter of COVID-19 infections, it is  
106 important to increase the acceptance of DCT apps in this population.<sup>10</sup> In other words,  
107 the public health benefits of adopting these apps need to be particularly recognized by  
108 the working-age population.<sup>9, 11</sup> In countries where installation of DCT apps is optional,  
109 such as North America, Europe, Oceania, and Japan, the installation rates tend to be  
110 lower compared with countries where it is mandatory.<sup>1, 7, 12</sup> However, few studies have  
111 evaluated the factors associated with acceptance of DCT apps using sufficient sample  
112 sizes of workers.<sup>13</sup> The purpose of the present study was to evaluate the factors  
113 associated with acceptance of a DCT app for COVID-19 in the working-age population of  
114 Japan, where app installation is optional. The findings provide insights that can help to  
115 facilitate the adoption of DCT apps among workers.

116  
117 **Methods**

### 118 Study design and participants

119 The present study had a cross-sectional design and used baseline questionnaire data  
120 from a prospective cohort research project in Japan, the Collaborative Online Research  
121 on the Novel-coronavirus and Work (CORoNaWork), between 22 and 26 December  
122 2020.<sup>14</sup> The study supplements another study from the CORoNaWork project that  
123 evaluated occupational factors associated with DCT adoption.<sup>10</sup> During the research  
124 period, COVID-19 vaccines had not yet been introduced in Japan and the third wave of  
125 infection was at its peak, with more than 3,000 new infections per day.<sup>15</sup> The inclusion

126 criteria for the study were: full-time worker status, age between 20 and 65 years, and  
127 registration with an internet survey company. Invitations were sent by e-mail to 605,381  
128 people registered with an internet survey company, of whom 55,045 people accessed the  
129 linked website. Of these, 33,302 participants who met the inclusion criteria provided  
130 informed consent and completed the baseline survey in an online format. After excluding  
131 6,266 participants who gave incorrect answers to questions designed to identify  
132 inappropriate responses, 27,036 participants were eligible for the analysis.

133  
134 The Contact-Confirming Application (COCOA) DCT app in Japan  
135 The COCOA is the only DCT app in Japan and was released by the Ministry of Health,  
136 Labour and Welfare in June 2020. The COCOA uses a decentralized approach through  
137 Bluetooth and is designed not to store personal information on a central server controlled  
138 by the government or the developer. Furthermore, downloading and deleting the COCOA  
139 is optional. If a person comes into contact with a COVID-19-positive person within a 1-m  
140 radius for more than 15 minutes, the person is notified as a close contact.<sup>6</sup>

141  
142 **Dependent variable**  
143 The dependent variable in the study was the following question about adoption of the  
144 COCOA: “Have you downloaded the Contact-Confirming Application (COCOA)?” The  
145 response options were “yes” and “no”.

146  
147 **Independent variables**  
148 Based on relevant studies, the independent variables were divided into four aspects:  
149 demographic, behavioral, psychological, and COVID-19 transmission-related variables.<sup>1,</sup>

150 <sup>3, 7-9</sup> Demographic variables included sex, age, marital status, education, annual  
151 household income (in Japanese yen), occupation (desk work, work with interpersonal  
152 communication, manual work), and family members living together. Behavioral variables  
153 included smoking status, alcohol consumption, and regular doctor's visits for chronic  
154 diseases. Psychological variables included fear of COVID-19 transmission. Variables  
155 related to COVID-19 transmission included wearing a mask, using hand sanitizer,  
156 willingness to be vaccinated against COVID-19, and presence of an acquaintance  
157 infected with COVID-19.

158  
159 **Statistical analysis**  
160 Factors associated with COCOA adoption were evaluated by univariate and multivariate  
161 logistic regression analyses, and the results were presented as odds ratios [ORs] and  
162 95% confidence intervals [CIs]. The multivariate analyses were adjusted for sex, age,  
163 marital status, education, and annual household income, based on relevant studies.<sup>1, 3, 7-9</sup>  
164 The *P*-values were two-sided, and statistical significance was set at  $P < 0.05$ . All  
165 statistical analyses were performed using Stata/SE 16.1 software (StataCorp, College  
166 Station, TX, USA).

167  
168 **Results**  
169 Table 1 shows the general characteristics of the study participants. Of the 27,036  
170 participants, around half were men (51.1%), married (55.6%), educated at university or  
171 graduate school (48.7%), and engaged in desk work (49.8%). Regarding acceptance of  
172 the DCT app for COVID-19, 6,786 respondents (25.1%) reported that they had  
173 downloaded the COCOA.



174  
175 Table 2 presents the factors associated with acceptance of the DCT app for COVID-19. In  
176 the multivariate analyses, married (adjusted OR: 1.29; 95% CI: 1.17–1.43) and  
177 divorced/widowed (adjusted OR: 1.16; 95% CI: 1.09–1.25) individuals had significantly  
178 higher acceptance of the DCT app than single individuals. Similarly, people with a  
179 university or graduate school degree had higher acceptance of the DCT app than people  
180 with a junior high school or high school degree (adjusted OR: 1.19; 95% CI: 1.11–1.28).  
181 Higher annual income was associated with higher acceptance of the app ( $\geq 8,000,000$   
182 yen: adjusted OR: 2.08; 95% CI: 1.80–2.39). In contrast, acceptance of the app was  
183 lower among people living with family members (adjusted OR: 0.82; 95% CI: 0.76–0.89).

184  
185 From the behavioral aspect, past smokers were more accepting of the app than  
186 non-smokers (adjusted OR: 1.24; 95% CI: 1.15–1.34), but there was no significant  
187 difference for smokers. Patients who regularly visited the hospital for chronic diseases  
188 were more likely to accept the app than patients who did not (adjusted OR: 1.39; 95% CI:  
189 1.32–1.48). From the psychological aspect, the odds of accepting the app were 2.29  
190 times (95% CI: 2.13–2.47) higher in people who feared COVID-19 transmission. From  
191 the COVID-19-related aspect, people who always wore a mask (adjusted OR: 2.44; 95%  
192 CI: 1.94–3.08) or used hand sanitizer (adjusted OR: 1.88; 95% CI: 1.71–2.07) were more  
193 likely to accept the app than people who rarely or never performed these actions.  
194 Acceptance of the app had 1.83 times higher odds (95% CI: 1.73–1.94) among people  
195 who were willing to receive the COVID-19 vaccine than among people who were not.  
196 Similarly, people who had an acquaintance infected with COVID-19 had 1.76 times  
197 higher odds (95% CI: 1.61–1.93) of accepting the app than people who did not.

198

## 199 **Discussion**

200 In the present study, the rate of downloading the COCOA in Japan was not very high at  
201 25.1%. The results revealed that there were several factors associated with downloading  
202 of the DCT app for each of the demographic, behavioral, psychological, and  
203 COVID-19-related variables. Although different countries have differing policies toward  
204 DCT apps, the present results suggest that adoption of DCT apps may be influenced by  
205 individual characteristics. The findings of the present study have important implications  
206 for the widespread adoption of DCT apps in working-age populations in Japan and  
207 elsewhere.

208

209 From the demographic aspect, the present study showed that the DCT app was more  
210 likely to be accepted by people with married status, university graduation or above,  
211 higher income, and desk work. These findings suggest that relatively wealthy people in  
212 society are more likely to use DCT apps, consistent with previous studies conducted in  
213 many countries including the United States, the United Kingdom, Switzerland, and  
214 Japan.<sup>8, 16-18</sup> In contrast, the present study found that living with family members tended  
215 to reduce the use of the DCT app, which was inconsistent with a previous study.<sup>19</sup>  
216 Although the reason for the discrepancy remains unclear, it is possible that family  
217 interactions reduced anxiety about COVID-19, which in turn reduced the need for the  
218 DCT app. Conflicting results were also reported in another study. Specifically, Tomczyk et  
219 al.<sup>20</sup> pointed out that greater perceived usefulness of DCT apps was associated with  
220 greater fear of COVID-19 infection and lower adoption of the apps. Therefore, people  
221 who are afraid of letting their families know that they are infected with COVID-19 may

222 tend to avoid DCT apps.

223

224 From the behavioral aspect, individuals with regular doctor's visits for chronic diseases  
225 and past smokers were more willing to adopt the DCT app, while current smokers  
226 showed no association in the present study. The severity of COVID-19 was reported to  
227 be higher in people with regular doctor's visits for chronic diseases such as hypertension  
228 and respiratory disease, and in smokers.<sup>21</sup> Therefore, the present results suggest that  
229 people with a greater risk of severe COVID-19 are more positive about adopting DCT  
230 apps. On the contrary, current smokers generally have limited access to health  
231 information, which may have attenuated the result.<sup>22</sup> Measures are needed to facilitate  
232 adoption of DCT apps by these people. For example, it may be useful for family  
233 physicians to encourage their patients to adopt DCT apps.

234

235 From the psychological aspect, fear of COVID-19 transmission was strongly associated  
236 with higher acceptance of the DCT app, consistent with a previous study in the United  
237 Kingdom that found a positive association between risk perception for COVID-19  
238 infection and acceptance of DCT apps.<sup>17</sup> Kawakami et al.<sup>19</sup> found that installation of a  
239 DCT app mitigated the psychological distress associated with the risk of COVID-19  
240 infection. Taken together, the findings suggest that fear of COVID-19 transmission  
241 increases the adoption of DCT apps and that appropriate adoption of DCT apps may  
242 reduce anxiety about COVID-19.

243

244 From the COVID-19-related aspect, wearing a mask, using hand disinfection, willingness  
245 to be vaccinated against COVID-19, and presence of an acquaintance infected with

246 COVID-19 led to greater likelihood of adopting the DCT app. A previous study in  
247 Singapore demonstrated similar findings for mask wearing and hand sanitizer use.<sup>7</sup> A  
248 similar trend was also observed in a study conducted in the United States, wherein  
249 people infected with COVID-19 had a higher acceptance rate of DCT apps.<sup>18</sup> Based on  
250 these findings, posting Quick Response codes for DCT apps on the packages of masks  
251 and hand sanitizers and at vaccination sites may be an effective measure. A function for  
252 inviting friends within the apps may also be effective.<sup>9</sup>

253  
254 There are several limitations to this study. First, we recruited participants who were  
255 registered with an internet research company. Therefore, we may have selected people  
256 who actively used the internet, smartphones, and apps. However, we consider this  
257 potential selection bias to be negligible because the COCOA downloading rate  
258 announced by the Ministry of Health, Labour and Welfare in December 2020 was  
259 20.8%,<sup>23</sup> and thus close to the rate in the present study (25.1%). Second, the present  
260 study used cross-sectional data for a single period of time. Therefore, the findings can  
261 only suggest associations between factors for this given period of time, and cannot  
262 capture changes over time within individuals. Third, in the multivariate logistic regression  
263 analyses, there was a possibility of unmeasured confounding. Unmeasured personal  
264 habits and behavioral patterns may have influenced the adoption of the DCT app.

265  
266 **Conclusions**  
267 The present study revealed factors associated with adoption of a DCT app among the  
268 working-age population in Japan. Use of the COCOA among Japanese workers was not  
269 sufficient, and it is important to develop an approach based on the present findings. We

270 found that relatively wealthy people in society were more likely to use the DCT app. In  
271 addition, people with a greater risk of severe COVID-19 were more positive about  
272 adopting the DCT app. Fear of COVID-19 transmission increased adoption of the DCT  
273 app, suggesting that appropriate adoption of DCT apps can reduce anxiety about  
274 COVID-19. Because wearing a mask, using hand disinfection, and willingness to be  
275 vaccinated against COVID-19 were associated with greater likelihood of adopting the  
276 DCT app, posting Quick Response codes for DCT apps on the packages of masks and  
277 hand sanitizers and at vaccination sites may be an effective measure.

278

## 279 **References**

- 280 1. Elkhodr M, Mubin O, Iftikhar Z, et al. Technology, Privacy, and User Opinions of  
281 COVID-19 Mobile Apps for Contact Tracing: Systematic Search and Content Analysis. *J*  
282 *Med Internet Res.* 2021;23:e23467.
- 283 2. Kouliaridis V, Kambourakis G, Chatzoglou E, Geneiatakis D, Wang H. Dissecting  
284 contact tracing apps in the Android platform. *PLoS One.* 2021;16:e0251867.
- 285 3. Anglemyer A, Moore TH, Parker L, et al. Digital contact tracing technologies in  
286 epidemics: a rapid review. *Cochrane Database Syst Rev.* 2020;8:CD013699.
- 287 4. Oldeweme A, Martins J, Westmattelmann D, Schewe G. The Role of Transparency,  
288 Trust, and Social Influence on Uncertainty Reduction in Times of Pandemics: Empirical  
289 Study on the Adoption of COVID-19 Tracing Apps. *J Med Internet Res.* 2021;23:e25893.
- 290 5. Rodriguez P, Grana S, Alvarez-Leon EE, et al. A population-based controlled  
291 experiment assessing the epidemiological impact of digital contact tracing. *Nat Commun.*  
292 2021;12:587.
- 293 6. Nakamoto I, Jiang M, Zhang J, et al. Evaluation of the Design and Implementation of

- 294 a Peer-To-Peer COVID-19 Contact Tracing Mobile App (COCOA) in Japan. *JMIR*  
295 *Mhealth Uhealth*. 2020;8:e22098.
- 296 7. Saw YE, Tan EY, Liu JS, Liu JC. Predicting Public Uptake of Digital Contact Tracing  
297 During the COVID-19 Pandemic: Results From a Nationwide Survey in Singapore. *J Med*  
298 *Internet Res*. 2021;23:e24730.
- 299 8. von Wyl V, Hoglinger M, Sieber C, et al. Drivers of Acceptance of COVID-19  
300 Proximity Tracing Apps in Switzerland: Panel Survey Analysis. *JMIR Public Health*  
301 *Surveill*. 2021;7:e25701.
- 302 9. Garrett PM, White JP, Lewandowsky S, et al. The acceptability and uptake of  
303 smartphone tracking for COVID-19 in Australia. *PLoS One*. 2021;16:e0244827.
- 304 10. Ishimaru T, Ibayashi K, Nagata M, et al. Industry and workplace characteristics  
305 associated with the downloading of a COVID-19 contact tracing app in Japan: a  
306 nation-wide cross-sectional study. *Environmental health and preventive medicine*.  
307 2021;26:94.
- 308 11. Garrett PM, Wang Y, White JP, et al. Young Adults View Smartphone Tracking  
309 Technologies for COVID-19 as Acceptable: The Case of Taiwan. *Int J Environ Res Public*  
310 *Health*. 2021;18.
- 311 12. Salathe M, Althaus C, Anderegg N, et al. Early evidence of effectiveness of digital  
312 contact tracing for SARS-CoV-2 in Switzerland. *Swiss Med Wkly*. 2020;150:w20457.
- 313 13. Kolasa K, Mazzi F, Leszczuk-Czubkowska E, Zrubka Z, Péntek M. State of the Art in  
314 Adoption of Contact Tracing Apps and Recommendations Regarding Privacy Protection  
315 and Public Health: Systematic Review. *JMIR Mhealth Uhealth*. 2021;9:e23250.
- 316 14. Fujino Y, Ishimaru T, Eguchi H, et al. Protocol for a Nationwide Internet-based Health  
317 Survey of Workers During the COVID-19 Pandemic in 2020. *J uoeh*. 2021;43:217-225.

- 318 15. Ishimaru T, Okawara M, Ando H, et al. Gender differences in the determinants of  
319 willingness to get the COVID-19 vaccine among the working-age population in Japan.  
320 *Hum Vaccin Immunother.* 2021;in press.
- 321 16. Machida M, Nakamura I, Kojima T, et al. Acceptance of a COVID-19 Vaccine in  
322 Japan during the COVID-19 Pandemic. *Vaccines.* 2021;9.
- 323 17. Lewandowsky S, Dennis S, Perfors A, et al. Public acceptance of  
324 privacy-encroaching policies to address the COVID-19 pandemic in the United Kingdom.  
325 *PLoS One.* 2021;16:e0245740.
- 326 18. Zhang B, Kreps S, McMurry N, McCain RM. Americans' perceptions of privacy and  
327 surveillance in the COVID-19 pandemic. *PLoS One.* 2020;15:e0242652.
- 328 19. Kawakami N, Sasaki N, Kuroda R, Tsuno K, Imamura K. The Effects of Downloading  
329 a Government-Issued COVID-19 Contact Tracing App on Psychological Distress During  
330 the Pandemic Among Employed Adults: Prospective Study. *JMIR Ment Health.*  
331 2021;8:e23699.
- 332 20. Tomczyk S, Barth S, Schmidt S, Muehlan H. Utilizing Health Behavior Change and  
333 Technology Acceptance Models to Predict the Adoption of COVID-19 Contact Tracing  
334 Apps: Cross-sectional Survey Study. *J Med Internet Res.* 2021;23:e25447.
- 335 21. Rahman A, Sathi NJ. Risk factors of the severity of COVID-19: A meta-analysis. *Int J*  
336 *Clin Pract.* 2021;75:e13916.
- 337 22. Paul CL, Ross S, Bryant J, Hill W, Bonevski B, Keevy N. The social context of  
338 smoking: A qualitative study comparing smokers of high versus low socioeconomic  
339 position. *BMC Public Health.* 2010;10:211.
- 340 23. Ministry of Health Labour and Welfare. COVID-19 Contact-Confirming Application.  
341 2021; Available at: [https://www.mhlw.go.jp/stf/seisakunitsuite/bunya/cocoa\\_00138.html](https://www.mhlw.go.jp/stf/seisakunitsuite/bunya/cocoa_00138.html).

342 Accessed 14 Jul, 2021.

343



344 Table 1. General characteristics of the study participants

|                                            | Total<br>N=27,036<br>n (%) | Acceptance of digital contact tracing<br>application for COVID-19 |                         |
|--------------------------------------------|----------------------------|-------------------------------------------------------------------|-------------------------|
|                                            |                            | Yes<br>n=6,786<br>n (%)                                           | No<br>n=20,250<br>n (%) |
| <b>Sex</b>                                 |                            |                                                                   |                         |
| Women                                      | 13,222 (48.9)              | 3,181 (46.9)                                                      | 10,041 (49.6)           |
| Men                                        | 13,814 (51.1)              | 3,605 (53.1)                                                      | 10,209 (50.4)           |
| <b>Age</b>                                 |                            |                                                                   |                         |
| 20–39 years                                | 6,763 (25.0)               | 1,669 (24.6)                                                      | 5,094 (25.2)            |
| 40–49 years                                | 8,011 (29.6)               | 1,886 (27.8)                                                      | 6,125 (30.2)            |
| 50–59 years                                | 9,012 (33.4)               | 2,359 (34.8)                                                      | 6,653 (23.9)            |
| 60–65 years                                | 3,250 (12.0)               | 872 (12.8)                                                        | 2,378 (11.7)            |
| <b>Marital status</b>                      |                            |                                                                   |                         |
| Single                                     | 9,164 (33.9)               | 1,991 (29.4)                                                      | 7,173 (35.4)            |
| Divorced or widowed                        | 2,843 (10.5)               | 722 (10.6)                                                        | 2,121 (10.5)            |
| Married                                    | 15,029 (55.6)              | 4,073 (60.0)                                                      | 10,956 (54.1)           |
| <b>Education</b>                           |                            |                                                                   |                         |
| Junior high or high school                 | 7,321 (27.1)               | 1,647 (24.3)                                                      | 5,674 (28.0)            |
| Vocational school or college               | 6,544 (24.2)               | 1,552 (22.9)                                                      | 4,992 (24.7)            |
| University or graduate school              | 13,171 (48.7)              | 3,587 (52.8)                                                      | 9,584 (47.3)            |
| <b>Annual household income</b>             |                            |                                                                   |                         |
| < 2,000,000 yen                            | 1,709 (6.3)                | 277 (4.1)                                                         | 1,432 (7.1)             |
| 2,000,000–3,999,999 yen                    | 5,548 (20.5)               | 1,188 (17.5)                                                      | 4,360 (21.5)            |
| 4,000,000–7,999,999 yen                    | 11,927 (44.1)              | 2,925 (43.1)                                                      | 9,002 (44.5)            |
| ≥ 8,000,000 yen                            | 7,852 (29.1)               | 2,396 (35.3)                                                      | 5,456 (26.9)            |
| <b>Job type</b>                            |                            |                                                                   |                         |
| Manual work                                | 6,641 (24.6)               | 1,283 (18.9)                                                      | 5,358 (26.5)            |
| Desk work                                  | 13,468 (49.8)              | 3,736 (55.1)                                                      | 9,732 (48.1)            |
| Work involving interpersonal communication | 6,927 (25.6)               | 1,767 (26.0)                                                      | 5,160 (25.5)            |
| <b>Family living together</b>              |                            |                                                                   |                         |
| No                                         | 5,807 (21.5)               | 1,400 (20.6)                                                      | 4,407 (21.8)            |
| Yes                                        | 21,229 (78.5)              | 5,386 (79.4)                                                      | 15,843 (78.2)           |
| <b>Smoking</b>                             |                            |                                                                   |                         |
| Never                                      | 14,587 (54.0)              | 3,495 (51.5)                                                      | 11,092 (54.8)           |
| Past                                       | 5,445 (20.1)               | 1,551 (22.9)                                                      | 3,894 (19.2)            |
| Current                                    | 7,004 (25.9)               | 1,740 (25.6)                                                      | 5,264 (26.0)            |

345

346

347 Table 1. General characteristics of the study participants (cont.)

|                                                           | Total<br>N=27,036<br>n (%) | Acceptance of digital contact tracing<br>application for COVID-19 |                         |
|-----------------------------------------------------------|----------------------------|-------------------------------------------------------------------|-------------------------|
|                                                           |                            | Yes<br>n=6,786<br>n (%)                                           | No<br>n=20,250<br>n (%) |
| <b>Alcohol intake</b>                                     |                            |                                                                   |                         |
| Never                                                     | 11,472 (42.4)              | 2,699 (39.8)                                                      | 8,773 (43.3)            |
| Occasionally                                              | 4,547 (16.8)               | 1,186 (17.5)                                                      | 3,361 (16.6)            |
| Regular                                                   | 11,017 (40.8)              | 2,901 (42.7)                                                      | 8,116 (40.1)            |
| <b>Regular doctor's visits for chronic diseases</b>       |                            |                                                                   |                         |
| No                                                        | 17,526 (64.8)              | 4,008 (59.1)                                                      | 13,518 (66.8)           |
| Yes                                                       | 9,510 (35.2)               | 2,778 (40.9)                                                      | 6,732 (33.2)            |
| <b>Fear of COVID-19 transmission</b>                      |                            |                                                                   |                         |
| No                                                        | 7,019 (26.0)               | 1,049 (15.5)                                                      | 5,970 (29.5)            |
| Yes                                                       | 20,017 (74.0)              | 5,737 (84.5)                                                      | 14,280 (70.5)           |
| <b>Wearing a mask</b>                                     |                            |                                                                   |                         |
| Rarely/never                                              | 682 (2.5)                  | 84 (1.2)                                                          | 598 (3.0)               |
| Often                                                     | 3,046 (11.3)               | 570 (8.4)                                                         | 2,476 (12.2)            |
| Always                                                    | 23,308 (86.2)              | 6,132 (90.4)                                                      | 17,176 (84.8)           |
| <b>Using hand sanitizer</b>                               |                            |                                                                   |                         |
| Rarely/never                                              | 3,740 (13.8)               | 633 (9.3)                                                         | 3,107 (15.3)            |
| Often                                                     | 8,282 (30.6)               | 1,965 (29.0)                                                      | 6,317 (31.2)            |
| Always                                                    | 15,014 (55.4)              | 4,188 (61.7)                                                      | 10,826 (53.5)           |
| <b>Willing to receive the COVID-19 vaccine</b>            |                            |                                                                   |                         |
| No                                                        | 16,889 (62.5)              | 3,467 (51.1)                                                      | 13,422 (66.3)           |
| Yes                                                       | 10,147 (37.5)              | 3,319 (48.9)                                                      | 6,828 (33.7)            |
| <b>Presence of an acquaintance infected with COVID-19</b> |                            |                                                                   |                         |
| No                                                        | 24,760 (91.6)              | 5,947 (87.6)                                                      | 18,813 (92.9)           |
| Yes                                                       | 2,276 (8.4)                | 839 (12.4)                                                        | 1,437 (7.1)             |

348 COVID-19: coronavirus disease 2019.

349

350 Table 2. Factors associated with acceptance of the digital contact tracing application for COVID-19

| Category                                   | Variable                      | Univariate  |             |         | Multivariate* |             |         |
|--------------------------------------------|-------------------------------|-------------|-------------|---------|---------------|-------------|---------|
|                                            |                               | OR          | (95% CI)    | P value | OR            | (95% CI)    | P value |
| Demographic                                | Sex                           |             |             |         |               |             |         |
|                                            | Women                         | 1.00        | -           | -       | 1.00          | -           | -       |
|                                            | Men                           | 1.12        | (1.06–1.18) | <0.001  | 1.03          | (0.96–1.10) | 0.402   |
|                                            | Age                           |             |             |         |               |             |         |
|                                            | 20–39 years                   | 1.00        | -           | -       | 1.00          | -           | -       |
|                                            | 40–49 years                   | 0.94        | (0.87–1.01) | 0.108   | 0.90          | (0.83–0.98) | 0.011   |
|                                            | 50–59 years                   | 1.08        | (1.01–1.16) | 0.033   | 0.99          | (0.91–1.07) | 0.752   |
|                                            | 60–65 years                   | 1.12        | (1.02–1.23) | 0.020   | 1.01          | (0.91–1.12) | 0.873   |
|                                            | Marital status                |             |             |         |               |             |         |
|                                            | Single                        | 1.00        | -           | -       | 1.00          | -           | -       |
|                                            | Divorced or widowed           | 1.23        | (1.11–1.35) | <0.001  | 1.16          | (1.09–1.25) | <0.001  |
|                                            | Married                       | 1.34        | (1.26–1.42) | <0.001  | 1.29          | (1.17–1.43) | <0.001  |
|                                            | Education                     |             |             |         |               |             |         |
|                                            | Junior high or high school    | 1.00        | -           | -       | 1.00          | -           | -       |
|                                            | Vocational school or college  | 1.07        | (0.99–1.16) | 0.089   | 1.08          | (0.99–1.17) | 0.078   |
|                                            | University or graduate school | 1.29        | (1.21–1.38) | <0.001  | 1.19          | (1.11–1.28) | <0.001  |
|                                            | Annual household income       |             |             |         |               |             |         |
|                                            | < 2,000,000 yen               | 1.00        | -           | -       | 1.00          | -           | -       |
|                                            | 2,000,000–3,999,999 yen       | 1.41        | (1.22–1.63) | <0.001  | 1.40          | (1.21–1.61) | <0.001  |
|                                            | 4,000,000–7,999,999 yen       | 1.68        | (1.47–1.92) | <0.001  | 1.60          | (1.39–1.83) | <0.001  |
| ≥ 8,000,000 yen                            | 2.27                          | (1.98–2.60) | <0.001      | 2.08    | (1.80–2.39)   | <0.001      |         |
| Job type                                   |                               |             |             |         |               |             |         |
| Manual work                                | 1.00                          | -           | -           | 1.00    | -             | -           |         |
| Desk work                                  | 1.60                          | (1.49–1.72) | <0.001      | 1.49    | (1.38–1.60)   | <0.001      |         |
| Work involving interpersonal communication | 1.43                          | (1.32–1.55) | <0.001      | 1.36    | (1.25–1.48)   | <0.001      |         |
| Family living together                     |                               |             |             |         |               |             |         |
| No                                         | 1.00                          | -           | -           | 1.00    | -             | -           |         |
| Yes                                        | 1.07                          | (1.00–1.15) | 0.049       | 0.82    | (0.76–0.89)   | <0.001      |         |

351 Table 2. Factors associated with acceptance of the digital contact tracing application for COVID-19 (cont.)

| Category         | Variable                                           | Univariate  |             |         | Multivariate* |             |         |
|------------------|----------------------------------------------------|-------------|-------------|---------|---------------|-------------|---------|
|                  |                                                    | OR          | (95% CI)    | P value | OR            | (95% CI)    | P value |
| Behavioral       | Smoking                                            |             |             |         |               |             |         |
|                  | Never smoking                                      | 1.00        | -           | -       | 1.00          | -           | -       |
|                  | Past smoking                                       | 1.26        | (1.18–1.36) | <0.001  | 1.24          | (1.15–1.34) | <0.001  |
|                  | Current smoking                                    | 1.05        | (0.98–1.12) | 0.156   | 1.05          | (0.98–1.12) | 0.212   |
|                  | Alcohol intake                                     |             |             |         |               |             |         |
|                  | Never                                              | 1.00        | -           | -       | 1.00          | -           | -       |
|                  | Occasionally                                       | 1.15        | (1.06–1.24) | 0.001   | 1.12          | (1.03–1.21) | 0.006   |
|                  | Regular                                            | 1.16        | (1.09–1.23) | <0.001  | 1.08          | (1.02–1.15) | 0.014   |
|                  | Regular doctor's visits for chronic diseases       |             |             |         |               |             |         |
| No               | 1.00                                               | -           | -           | 1.00    | -             | -           |         |
| Yes              | 1.39                                               | (1.32–1.47) | <0.001      | 1.39    | (1.32–1.48)   | <0.001      |         |
| Psychological    | Fear of COVID-19 transmission                      |             |             |         |               |             |         |
|                  | No                                                 | 1.00        | -           | -       | 1.00          | -           | -       |
| Yes              | 2.29                                               | (2.13–2.46) | <0.001      | 2.29    | (2.13–2.47)   | <0.001      |         |
| COVID-19 related | Wearing a mask                                     |             |             |         |               |             |         |
|                  | Rarely/never                                       | 1.00        | -           | -       | 1.00          | -           | -       |
|                  | Often                                              | 1.64        | (1.28–2.10) | <0.001  | 1.57          | (1.23–2.01) | <0.001  |
|                  | Always                                             | 2.54        | (2.02–3.20) | <0.001  | 2.44          | (1.94–3.08) | <0.001  |
|                  | Using hand sanitizer                               |             |             |         |               |             |         |
|                  | Rarely/never                                       | 1.00        | -           | -       | 1.00          | -           | -       |
|                  | Often                                              | 1.53        | (1.38–1.69) | <0.001  | 1.50          | (1.36–1.66) | <0.001  |
|                  | Always                                             | 1.90        | (1.73–2.08) | <0.001  | 1.88          | (1.71–2.07) | <0.001  |
|                  | Willing to receive the COVID-19 vaccine            |             |             |         |               |             |         |
|                  | No                                                 | 1.00        | -           | -       | 1.00          | -           | -       |
|                  | Yes                                                | 1.88        | (1.78–1.99) | <0.001  | 1.83          | (1.73–1.94) | <0.001  |
|                  | Presence of an acquaintance infected with COVID-19 |             |             |         |               |             |         |
| No               | 1.00                                               | -           | -           | 1.00    | -             | -           |         |
| Yes              | 1.85                                               | (1.69–2.02) | <0.001      | 1.76    | (1.61–1.93)   | <0.001      |         |

352 COVID-19: coronavirus disease 2019; OR: odds ratio; CI: confidence interval.

353 \*Adjusted for sex, age, income, marital status, education, and annual household income.
